# Supplementary material for: Evaluation of the PPAR-γ Agonist Pioglitazone in Mild Asthma: A Double-Blind Randomized Controlled Trial
Source: PLoS One. 2016 Aug 25;11(8):e0160257. doi: 10.1371/journal.pone.0160257 (PMC4999189; doi:10.1371/journal.pone.0160257)
Supplement: S1 Data — (XLSX) [file pone.0160257.s001.xlsx]

## Sheet: full_analysis_set_invest
patno	GROUP	drguse	age	sex	ethnic	pkyrs_t	wtkg_t	htm_t	bmi_t	dose	Durasthma	scfev1	scpcpredfev1	scfvc	scpcpredfvc	scratiopc	scpostbdfev1	reversltrs	reverspc	predfev1	predfvc	pat0	baacq_t	baaqlq_t	bae0101_t	bae0102_t	bavfe010	log10bavfe010	bae0301_t	bae0302_t	bavfe030	log10bavfe030	bae0501_t	bae0502_t	bafe050	log10bafe050	bae01h1_t	bae01h2_t	bavfe0100	log10bavfe0100	bae02h1_t	bae02h2_t	bavfe0200	log10bafe0200	bapfev1_t	bapredfev1pc	bapfvc_t	bapredfvcpc	bappct_t
12	1	1	69	1	0	0	67.5	1.6	26	400	19	2.1	105	2.8	116.667	75	2.15	0.05	2	2	2.4	12	0.71	6.06					39.6	45.7	42.65	1.62992	27.6	28.3	27.95	1.44638	16.2	18	17.1	1.233	9.8	9.8	9.8	0.991226	2.25	112.5	2.95	122.917	76
13	0	1	69	1	0	0	82.9	1.55	35	800	33	1.25	69.4444	1.9	87.156	66	1.4	0.15	12	1.8	2.18	13	0.71	6.13									16.7	17.4	17.05	1.23172	9.9	12.6	11.25	1.05115					1.3	72.2222	1.95	89.4495	67
15	0	1	51	0	0	0	74.3	1.72	25	400	50	2.5	72.8863	4.85	114.387	52	2.8	0.3	12	3.43	4.24	15	1	6.34					72	80.2	76.1	1.88138	55.9	62.7	59.3	1.77305	34.7	38	36.35	1.5605	20.9	23.7	22.3	1.3483	2.4	69.9708	4.35	102.594	55
16	0	1	65	1	0	0	57	1.56	23	400	35	1.75	90.2062	2.95	126.609	59.3	2.1	0.35	20	1.94	2.33	16	0.3	6.7	105	108.7	106.85	2.02877	42.6	47.9	45.25	1.65562	26.9	26.1	26.5	1.42325	18	16.5	17.25	1.23679	10.5	9.4	9.95	0.997823	1.9	97.9381	3.15	135.193	60
19	0	1	24	0	0	0	98	1.82	30	200	19	5.3	114.967	6.2	112.933	85	5.4	0.1	2	4.61	5.49	19	1.57	5.94	68.8	66.4	67.6	1.82995	31.9	33.4	32.65	1.51388	21.7	21	21.35	1.3294	11.5	12.7	12.1	1.08279	6.6	7.3	6.95	0.841985	5.25	113.883	6	109.29	88
20	0	1	58	1	0	0	80	1.66	29	400	52	2.3	90.9091	2.6	87.2483	88	2.55	0.25	11	2.53	2.98	20	1.29	5.38	135.9	129.6	132.75	2.12303	54.6	59.7	57.15	1.75702	35.2	38.1	36.65	1.56407	26.3	19.7	23	1.36173	13.1	10.7	11.9	1.07555	2.35	92.8854	2.85	95.6376	82
21	0	0	47	1	0	6.5	70.7	1.66	26	0	24	2.2	79.1367	3.2	98.7654	69	2.85	0.65	30	2.78	3.24	21	2.71	5.91					233.2	228.2	230.7	2.36305	181.8	181.4	181.6	2.25912	96.5	97.2	96.85	1.9861	55.4	54.5	54.95	1.73997	2.2	79.1367	3.05	94.1358	72
22	1	1	59	1	0	0	73.8	1.67	26	200	33	1.75	69.4444	2.85	95.9596	61	2.2	0.45	25.7	2.52	2.97	22	0.7	6.79	65.2		65.2	1.81425	23.4	23.3	23.35	1.36829	15	17.8	16.4	1.21484	10.1	8.3	9.2	0.963788	6.7	4.1	5.4	0.732394	2	79.3651	2.95	99.3266	68
24	1	1	69	1	0	0	98.8	1.65	36	200	59	2	91.3242	2.5	95.057	80	2.35	0.35	18	2.19	2.63	24	0.71	5.88					38.9	48.1	43.5	1.63849	36.4	37.2	36.8	1.56585	22.7	21.8	22.25	1.34733	14.4	13.2	13.8	1.13988	2.05	93.6073	2.55	96.9582	80
26	1	1	64	0	0	0	75.7	1.74	25	400	54	2.1	66.879	3.55	88.3085	59	2.45	0.35	17	3.14	4.02	26	1	6.31					21.4	22	21.7	1.33646	19.6	23.3	21.45	1.33143	10.3	10.1	10.2	1.0086	5.1	4.1	4.6	0.662758	2.05	65.2866	3.55	88.3085	58
27	1	1	65	0	0	2.5	91	1.7	31	50	61	2.05	69.9659	3.35	89.0957	61	2.3	0.25	12	2.93	3.76	27	0.57	6.78	72.6	81.3	76.95	1.88621	29.3	31.5	30.4	1.48287	19	22.9	20.95	1.32118	12.6	11.6	12.1	1.08279	6.1	8.4	7.25	0.860338	2	68.2594	3.2	85.1064	62.5
31	1	0	73	1	0	0	64.8	1.58	26	0	19	1.9	104.396	2.7	122.172	70.4	1.95	0.05	3	1.82	2.21	31	1.14	4.72					9.1	8.2	8.65	0.937016	11.9	8.5	10.2	1.0086	6.2	7.4	6.8	0.832509	7	5.3	6.15	0.788875	1.95	107.143	3.1	140.271	63
32	0	1	65	0	0	0.45	63.4	1.78	20	400	54	2.6	79.2683	5.8	137.441	45	3	0.4	15	3.28	4.22	32	0.71	6.63	125.5	123.8	124.65	2.09569	57.1	58.6	57.85	1.7623	41.7	47.5	44.6	1.64933	23.1	24.6	23.85	1.37749	11.5	14.7	13.1	1.11727	2.35	71.6463	5.8	137.441	41
39	1	1	67	0	0	5	76.6	1.72	26	400	11	2.95	99.6622	4.25	110.966	69	3.2	0.25	8	2.96	3.83	39	0.86	6.57	84.9	78.7	81.8	1.91275	43.8	46	44.9	1.65225	29.8	31.1	30.45	1.48359	16.8	17.1	16.95	1.22917	10.6	9.7	10.15	1.00647	2.65	89.527	3.75	97.9112	71
40	1	0	65	1	0	10	68.4	1.55	28	0	12	2.05	107.895	2.7	117.904	76	2.1	0.05	2	1.9	2.29	40	1.43	5.25									9.1	11.7	10.4	1.01703									1.85	97.3684	2.55	111.354	73
41	1	0	34	0	0	0	96	1.82	29	0	34	3.4	78.1609	4.45	84.6008	76	3.6	0.2	6	4.35	5.26	41	1.71	4.72					13	12	12.5	1.09691	8.4	8.2	8.3	0.919078	5.6	4.2	4.9	0.690196	2.9	3	2.95	0.469822	3.6	82.7586	4.45	84.6008	81
42	0	1	41	1	0	0	70	1.61	27	400	21	3	109.89	3.95	124.214	76	3.2	0.2	7	2.73	3.18	42	0.57	5.72	33.7	55.4	44.55	1.64885					13.5	16.4	14.95	1.17464	8.9	10.8	9.85	0.993436	4.3	5.3	4.8	0.681241	3	109.89	3.8	119.497	79
43	1	1	50	0	0	0	88.8	1.82	27	200	40	3.85	98.9717	5.25	108.471	73	4.35	0.5	13	3.89	4.84	43	1	5.84	28.2	37.7	32.95	1.51786	40.2	41.4	40.8	1.61066	30.1	27.8	28.95	1.46165	16.6	15.7	16.15	1.20817	9.7	11.5	10.6	1.02531	3.85	98.9717	5.2	107.438	74
44	0	1	43	1	0	0	62.5	1.62	24	200	33	2.45	90.0735	3.05	96.2145	80	2.75	0.3	12	2.72	3.17	44	0.14	6.84	41.1	74.4	57.75	1.76155					23	25.3	24.15	1.38292	14.7	13.5	14.1	1.14922	7.2	6.7	6.95	0.841985	2.45	90.0735	3.05	96.2145	80
48	1	1	72	1	0	0	73.4	1.68	26	400	1	1.5	66.9643	2	74.6269	75	1.7	0.2	13	2.24	2.68	48	1	6									15.6	10.8	13.2	1.12057	10.7	15.1	12.9	1.11059					1.55	69.1964	2	74.6269	77.5
49	0	0	52	0	0	5.25	83.8	1.72	28	0	51	2.1	61.2245	3.75	88.4434	56	3.4	1.3	62	3.43	4.24	49	2.14	5.84	74.3		74.3	1.87099					27.2	28.8	28	1.44716	15.9	13.8	14.85	1.17173	7.7	8.8	8.25	0.916454	1.85	53.9359	3.6	84.9057	51
52	0	1	35	0	0	1.65	72	1.66	26	200	29	3.55	96.9945	4.9	112.903	72	4.1	0.55	15	3.66	4.34	52	1.14	5.44	90.6	85.7	88.15	1.94522	39.6	34.3	36.95	1.56761	17.5	17.1	17.3	1.23805	11.6	11.1	11.35	1.055	7	6.5	6.75	0.829304	3.5	95.6284	4.9	112.903	71
53	1	1	63	0	0	0	88.9	1.91	24	200	10	3.1	79.4872	3.95	78.6853	78	3.3	0.2	6	3.9	5.02	53	0.86	6.47					50.6	54.1	52.35	1.71892	47.2	42.2	44.7	1.65031	21.6	21.5	21.55	1.33345	11.6	11.3	11.45	1.05881	2.85	73.0769	4	79.6813	71
55	0	1	43	1	0	0	57.7	1.53	25	200	18	2.6	109.705	3.45	124.549	75	3	0.4	15	2.37	2.77	55	0.71	6.41	281.4	271.7	276.55	2.44177	120.2	116	118.1	2.07225	80.9	73.6	77.25	1.8879	41.4	41.1	41.25	1.61542	23.1	23	23.05	1.36267	2.5	105.485	3.45	124.549	72
57	0	1	41	0	0	0.3	69	1.6	27	200	18	3.5	109.375	4.25	111.549	82	3.75	0.25	7	3.2	3.81	57	0.42	6.34	107.5	115	111.25	2.0463	59.2	60.1	59.65	1.77561	37.8	39.2	38.5	1.58546	27.8	23.7	25.75	1.41078	12.1	14.4	13.25	1.12222	3.5	109.375	4.3	112.861	81
59	1	1	23	0	0	0	83.2	1.75	27	200	15	4.2	97.4478	4.65	91.3556	90.3	4.3	0.1	2	4.31	5.09	59	1	6.22									27.7	26.2	26.95	1.43056	16.5	16	16.25	1.21085	10.3	8.9	9.6	0.982271	4.05	93.9675	4.45	87.4263	91
60	1	1	61	1	0	0	59.3	1.54	25	200	55	2.25	114.796	3	127.66	75	2.75	0.5	22	1.96	2.35	60	0.57	6.62									51.3	53	52.15	1.71725	23.3	23.5	23.4	1.36922	13	12.7	12.85	1.1089	2.25	114.796	3.3	140.426	68
63	1	1	22	0	0	0	81	1.66	29	400	12	3.9	99.4898	5.45	119.256	72	4.35	0.45	11.5	3.92	4.57	63	0.28	6.87									49.8	49.1	49.45	1.69417	29.3	28.1	28.7	1.45788	14.7	15.9	15.3	1.18469	3.55	90.5612	5.25	114.88	68
64	1	1	64	1	0	0	69.9	1.59	28	400	8	1.95	93.75	2.8	112.45	70	2.15	0.2	10	2.08	2.49	64	1	5.77					15	13.9	14.45	1.15987	10.7	9.6	10.15	1.00647	5.8	5.9	5.85	0.767156	2.6	4.5	3.55	0.550228	2.05	98.5577	2.8	112.45	73
65	0	1	50	0	0	5	88.3	1.68	31	800	50	2.65	80.7927	3.6	89.1089	74	2.95	0.3	11	3.28	4.04	65	2.28	5.37									15.7	28.1	21.9	1.34044	12.4	11.5	11.95	1.07737	12.1	5.7	8.9	0.94939	2.63	80.1829	3.55	87.8713	74
67	0	1	62	1	0	5	76.3	1.65	28	200	19	2.3	96.2343	3.2	113.074	72	2.6	0.3	13	2.39	2.83	67	0.14	6.65	155.8	164.8	160.3	2.20493					43.3	42.8	43.05	1.63397	26	23.3	24.65	1.39182	12.6	14.6	13.6	1.13354	2.4	100.418	3.2	113.074	75
68	1	1	41	1	0	0	85	1.74	28	200	31	3.5	107	4.5	119	78	3.9	0.4	11	3.27	3.78														12.3	1.08991									3.5	107.034	4.65	123.016	75
69	0	1	24	0	1	0	83.7	1.67	30	400	25	3.45	86.9018	4.7	101.512	73	3.95	0.5	14	3.97	4.63	69	2.14	4.75	215.7	238.2	226.95	2.35593	117.7	108.7	113.2	2.05385	75.4	82.9	79.15	1.89845	45.3	38.4	41.85	1.6217	20.5	21.9	21.2	1.32634	3.05	76.8262	4.6	99.3521	66
70	0	0	63	1	0	5	62.1	1.63	23	0	24	2.2	97.3451	3	111.524	73	2.45	0.25	11	2.26	2.69	70	1.14	5.4					33.3	30.8	32.05	1.50583	23.6	20.5	22.05	1.34341	10.3	12.6	11.45	1.05881	6.7	7.9	7.3	0.863323	2.1	92.9204	2.8	104.089	75
71	1	1	57	0	0	0	64.2	1.67	23	600	55	2.3	75.6579	3.45	90.7895	67	2.7	0.4	17	3.04	3.8	71	1.14	5.69	86.1	78.7	82.4	1.91593	31.3	32.5	31.9	1.50379	22.5	22.9	22.7	1.35603	13.1	11.8	12.45	1.09517	7.4	6.9	7.15	0.854306	2.25	74.0132	3.35	88.1579	67
72	0	0	56	0	0	0	78.4	1.61	30	0	36	3.4	120.996	4.6	132.184	74	3.65	0.25	7	2.81	3.48	72	1.14	6.03					17.3	16.7	17	1.23045	12	11.8	11.9	1.07555	7.6	8.9	8.25	0.916454	5.4	4.5	4.95	0.694605	3.3	117.438	4.5	129.31	73
73	0	1	56	1	0	0	67.3	1.63	25	200	16	1.95	79.918	2.65	92.3345	74	2.2	0.25	12.8	2.44	2.87	73	1.43	6.03	180	191.4	185.7	2.26881	94	100.7	97.35	1.98834	70	65.8	67.9	1.83187	41.7	42.2	41.95	1.62273	22.7	23	22.85	1.35889	2.1	86.0656	2.75	95.8188	76
74	0	1	40	1	0	0	82	1.64	30	300	12	2.85	98.9583	4.4	131.737	65	3.2	0.35	12	2.88	3.34	74	0.86	6.4					115.5	113.2	114.35	2.05824	80.1	79.9	80	1.90309	45.9	46.3	46.1	1.6637	25.8	26.7	26.25	1.41913	2.75	95.4861	4.25	127.246	65
75	0	1	65	1	0	0	97	1.63	37	400	21	2.4	107	3.15	118	76	2.6	0.2	8	2.24	2.67		0.14	6.15											5.4	0.732394									2.4	107.143	3.15	117.978	76
77	1	1	73	1	0	6.4	63.4	1.65	23	200	16	1.75	83.7321	2.5	99.2063	70	1.85	0.1	6	2.09	2.52	77	1	6.7									18.9	21.1	20	1.30103	9.8	10.9	10.35	1.01494	5.2	5.2	5.2	0.716003	1.7	81.3397	2.35	93.254	72
78	1	1	60	1	0	0	70.5	1.66	26	400	9	2.45	98.7903	3.55	121.16	69	2.55	0.1	4	2.48	2.93	78	0.71	6.34					43.8	47.7	45.75	1.66039	32.5	34.3	33.4	1.52375	19.4	21.9	20.65	1.31492	12.3	11.8	12.05	1.08099	2.3	92.7419	3.25	110.922	71
79	1	0	54	0	0	0	80.3	1.78	25	0	1	3.15	87.5	4.3	95.3437	73	3.65	0.5	16	3.6	4.51	79	0.86	5.94					32.5	31.3	31.9	1.50379	25.2	20.5	22.85	1.35889	9.2	11	10.1	1.00432	8.3	7	7.65	0.883661	3.2	88.8889	4.3	95.3437	74
80	1	0	58	0	0	0	77	1.77	25	0	37	2.2	63.9535	4.05	93.1034	54	2.75	0.55	25	3.44	4.35	80	0.571	6.96	68.9	62.9	65.9	1.81889	29.2	29.9	29.55	1.47056	18.6	19.4	19	1.27875	10.1	10.6	10.35	1.01494	6.9	8.5	7.7	0.886491	2.25	65.407	4.15	95.4023	54
81	0	0	61	0	0	10	105	1.95	28	0	23	2.7	65.0602	5.4	101.313	50	3.2	0.5	19	4.15	5.33	81	1	6.625	79.5	79.1	79.3	1.89927	40.6	45.7	43.15	1.63498	34	33.6	33.8	1.52892	18.3	20.3	19.3	1.28556	10.6	12.7	11.65	1.06633	2.7	65.0602	5.2	97.561	52
82	1	0	47	0	0	2.5	91.5	1.88	26	0	23	4.3	101.655	5.55	105.313	77	4.6	0.3	7	4.23	5.27	82	1.71	6.34	264.6	259.9	262.25	2.41872	141.1	142.3	141.7	2.15137	97.2	99.7	98.45	1.99322	56.9	62.2	59.55	1.77488	30.5	33.9	32.2	1.50786	4.4	104.019	5.75	109.108	77
84	0	0	57	1	0	0.7	76.9	1.64	29	0	21	2.5	100.806	3.6	123.288	69	2.8	0.3	12	2.48	2.92	84	0.71	6.68					33.5	33.9	33.7	1.52763	26.3	24.1	25.2	1.4014	13	14	13.5	1.13033	8.2	7.5	7.85	0.89487	2.35	94.7581	3.6	123.288	65
85	1	1	67	1	0	0	63.4	1.59	25	400	65	1.55	76.3547	2.8	114.754	55	1.75	0.2	13	2.03	2.44	85	0.43	6.77									10.4	11.8	11.1	1.04532	9.1	8.2	8.65	0.937016	4.5	5.6	5.05	0.703291	1.65	81.2808	2.6	106.557	63
86	1	0	49	0	0	0	109	1.76	35	0	30	3.3	89.4309	4.35	95.6044	76	3.6	0.3	9	3.69	4.55	86	1.28	6.34	196.5	156.8	176.65	2.24711	97.6	107.2	102.4	2.0103	68.8	76.5	72.65	1.86124	49.8	47.4	48.6	1.68664	26.1	25.7	25.9	1.4133	3.25	88.0759	4.2	92.3077	77
87	0	0	64	0	0	1.5	78.9	1.73	26	0	57	3	96.1538	3.9	97.7444	77	3.2	0.2	7	3.12	3.99	87	1.29	5.193					31.3	32.6	31.95	1.50447	26.1	25.9	26	1.41497	18.4	14.6	16.5	1.21748	6.8	6.7	6.75	0.829304	3.2	102.564	3.95	98.9975	81
88	0	1	57	1	0	8	110	1.63	41	750	26	2.7	111	3.3	115	82	2.8	0.1	4	2.44	2.87		0.14	6.9											13.95	1.14457									2.6	106.557	3.3	114.983	79
90	1	1	71	0	0	0	79	1.78	25	400	26	2.6	83.0671	4.2	102.689	62	2.85	0.25	10	3.13	4.09	90	1.14	6.218					39.3	36.9	38.1	1.58092	27.4	27.4	27.4	1.43775	15.5	16.8	16.15	1.20817	9.7	9.1	9.4	0.973128	2.75	87.8594	4.1	100.244	67
91	0	1	52	1	0	0.25	63.7	1.55	27	400	29	2.05	93.1818	2.5	96.1538	82	2.25	0.2	10	2.2	2.6	91	1.142	4.156					65.1	60.5	62.8	1.79796	39.5	44.5	42	1.62325	23.1	25.7	24.4	1.38739	13.8	11.2	12.5	1.09691	2.1	95.4545	2.55	98.0769	82
93	0	1	19	0	0	0	92.8	1.75	30	400	18	3.15	73.0858	5.3	104.126	59	4.15	1	32	4.31	5.09	93	1.17	6.56					36.4	35.7	36.05	1.55691	25.7	23.7	24.7	1.3927	16.1	14.3	15.2	1.18184	7.5	9	8.25	0.916454	3.15	73.0858	5.65	111.002	56
95	1	1	50	1	0	0	74.5	1.68	26	400	45	2.2	79.7101	2.85	88.2353	77	2.5	0.3	14	2.76	3.23	95	0.714	6.656									12.9	12.8	12.85	1.1089	9	11.1	10.05	1.00217					2.3	83.3333	2.8	86.6873	82
98	1	1	64	1	0	10	86.4	1.65	32	250	48	1.7	73	2.4	87	71	2.1	0.4	24	2.32	2.76
99	0	1	48	1	0	0	74	1.65	27	200	4	2.9	107	3.6	114	81	3.1	0.2	7	2.72	3.17		0.57	6.53											11.8	1.07188									3.05	112.132	3.6	113.565	85
100	1	1	44	0	0	0.5	81.2	1.75	27	200	33	2.95	79.0885	4.3	94.0919	69	3.2	0.25	8	3.73	4.57	100	1.14	6.09	34	33.9	33.95	1.53084	16.5	17	16.75	1.22401	13.3	12	12.65	1.10209	7.5	3.9	5.7	0.755875	2.1	2.9	2.5	0.39794	3.05	81.7694	4.3	94.0919	71
102	1	0	67	0	0	0	74	1.77	24	0	64	2.9	92.0635	4.25	103.912	68	3.2	0.3	10	3.15	4.09	102	0.71	6.13	98.3	96.8	97.55	1.98923	45.5	45.8	45.65	1.65944	34.7	36.7	35.7	1.55267	20.6	21	20.8	1.31806	10.6	14.6	12.6	1.10037	2.85	90.4762	4.3	105.134	66
103	0	1	47	0	0	0	77.2	1.65	28	400	47	2.65	82	3.95	100	67	2.7	0.05	2	3.24	3.94		0.86	6.25											7.1	0.851258									2.7	83.3333	3.95	100.254	68
104	1	0	40	0	0	0	71.8	1.73	24	0	35	3.75	99	5.85	128	64	4.3	0.55	15	3.79	4.58		0.29	6.84											31.6	1.49969									3.45	91.029	5.5	120.087	63
107	1	1	71	0	0	5	99.6	1.89	28	400	16	2.05	57	3.5	74	59	2.5	0.45	22	3.61	4.73		1.14	6.19											37	1.5682									2.1	58.1717	3.5	73.9958	60
109	0	1	42	0	0	0	108	1.85	32		38	4.1	97.1564	5.55	106.731	74	4.85	0.75	18	4.22	5.2	109	0.57	6.53									9		9	0.954243									4.1	97.1564	5.55	106.731	74
110	0	1	65	0	0	7.5	106	1.84	31	400	28	3.8	106	5.45	119	70	4.1	0.3	8	3.57	4.59		1.86	6.38											19	1.27875									3.6	100.84	5.05	110.022	71
112	1	1	68	1	0	0	75	1.66	27	800	13	3.15	139	4.15	154	76	3.2	0.05	3.2	2.26	2.7		0.43	5.75											12.7	1.1038									2.9	128.319	3.3	122.222	88
114	0	0	64	0	0	8	64.9	1.59	26	0	53	2.6	105.691	3.7	118.211	70	2.7	0.1	4	2.46	3.13	114	0.43	6.74									21		21	1.32222									2.6	105.691	3.65	116.613	71
115	0	1	72	0	0	10	82.3	1.79	26	400	41	2.5	79	3.4	83	74	2.65	0.15	6	3.15	4.12		1.43	5.94											32.75	1.51521									2.6	82.5397	3.2	77.6699	81
119	1	1	48	0	0	0	82	1.8	25	400	46	2.55	66	5.4	112	47	3.95	1.4	55	3.89	4.81		1.86	6											31	1.49136									3	77.1208	5.5	114.345	55
122	0	1	55	0	0	8	85	1.82	26	400	9	3.5	94	4.7	100	74	3.75	0.25	7	3.74	4.71		0.71	6.72											18.1	1.25768									3.5	93.5829	5.1	108.28	69
[truncated: 92 more columns]
